## Correlation between atrial electrocardiographic indexes and left atrial enlargement in competitive athletes. From the ALMUDAINA case-control study

C. Herrera<sup>1</sup>, V. Bruna<sup>2</sup>, A. Comella<sup>3</sup>, A. De La Rosa<sup>4</sup>, L. Diaz-Gonzalez<sup>5</sup>, M. Ruiz-Ortiz<sup>6</sup>, J. Lacalzada-Almeida<sup>7</sup>, A. Lucia<sup>8</sup>, A. Boraita<sup>9</sup>, A. Bayes-De-Luna<sup>10</sup>, M. Martinez-Selles<sup>1</sup>

<sup>1</sup>University Hospital Gregorio Marañon, Madrid, Spain; <sup>2</sup>University Hospital 12 de Octubre, Cardiology, Madrid, Spain; <sup>3</sup>Universidad de Vic-Universidad Central de Catalunya, Laboratorio de fisiología del ejercicio de Bayés Esport. Research Group M3O., Vic, Spain; <sup>4</sup>Hospiten Roca, Cardiology, Las Palmas de Gran Canaria, Spain; <sup>5</sup>Centro Clinic, Cardiology, Madrid, Spain; <sup>6</sup>University Hospital Reina Sofia, Cardiology, Cordoba, Spain; <sup>7</sup>University of La Laguna, Cardiology, Tenerife, Spain; <sup>8</sup>University Hospital 12 de Octubre, Instituto de investigación Hospital 12 de Octubre, Madrid, Spain; <sup>9</sup>Centro de Medicina del Deporte, Cardiology, Madrid, Spain; <sup>10</sup>Hospital de la Santa Creu i Sant Pau, Fundación de Investigación Cardiovascular. ICCV-Instituto de Investigación., Barcelona, Spain

On behalf of ALMUDAINA Case-Control Study

**Funding Acknowledgement:** Type of funding sources: None.

**Background:** Left atrial (LA) remodelling and enlargement in athletes is a well-known component of the athlete's heart. However, information about the correlation between of LA enlargement and atrial electrophysiological features in athletes is scarce.

**Purpose:** Our aim was to characterize LA enlargement, P-wave duration, and the prevalence of interatrial block (IAB) in competitive athletes (with and without LA enlargement) and in controls.

**Methods:** ALMUDAINA (Analysis of Left atrial Measurements of Ultra-sound Dilation Among International and National Athletes) was a nationwide, cross-sectional study involving 9 hospitals and sport clinics across Spain. Cases fulfilled the international consensus definition of a competitive athlete and were currently engaged in skill, power, mixed or endurance disciplines at a national or international level. The following P-wave parameters were analysed: 1) duration 2) voltage in lead I and 3) the presence of interatrial block (IAB). LA enlargement was defined as an indexed volume by body surface area  $\geq 34$  mL/m<sup>2</sup>, measured by transthoracic echocardiography. A contemporary cohort of otherwise healthy and active controls was used as a comparison group.

**Results:** Baseline clinical and echocardiographic characteristics of both cohorts are summarised in table 1 whereas electrocardiographic characteristics are displayed in table 2, respectively. 356 subjects were included,

308 athletes (mean age: 36.4±11.6 years) and 48 controls (mean age: 49.3±16.1 years). Athletes showed a higher mean LA indexed volume (29.8±8.6 vs. 25.6±8.0 mL/m<sup>2</sup>, P=0.006) and higher prevalence of LA enlargement (113 [36.7%] vs. 5 [10.4%], P<0.001), but there were no relevant differences in P-wave duration (106.3±12.5 ms vs 108.2±7.7 ms; P=0.31), voltage in lead I (0.08±0.04 vs. 0.08±0.04 mV; P=0.79) and the prevalence of IAB (40 [13.0%] vs. 4 [8.3%], P=0.36). Only a case of advance IAB was detected, in an athlete without LA enlargement. Among athletes, those with LA enlargement (113, 36.7%) had higher P-wave duration (110.3±14.1 vs. 103.0±10.9 ms, P<0.001) and a higher prevalence of interatrial blockade (23 [20.4%] vs. 17 [8.8%], P=0.004), but similar voltage of P-wave in lead I (0.08±0.003 vs. 0.08±0.05 mV, P=0.689). In a multivariate analysis, competitive training was independently associated with LA enlargement (odds ratio [OR] 14.7, 95% confidence interval [CI] 4.7–44.0; P<0.001) but was not associated with P-wave duration (OR 1.02, 95% CI: 0.99–1.04; P=0.19) or IAB (OR 1.4, 95% CI 0.7–3.1; P=0.34).

**Conclusions:** LA enlargement is prevalent in adult competitive athletes. However, ECG indexes of atrial electrophysiology were not different from healthy controls. Our data suggest that LA enlargement and IAB are two different entities.

**Table 1. Baseline clinical and echocardiographic characteristics of athletes and controls.** Data are presented as frequencies (percentages) or mean (± standard deviation, SD), as appropriate. IVS, interventricular septum; LAiV, left atrial indexed volume; LV, left ventricle. LVEF, left ventricular ejection fraction; TAPSE, tricuspid annular plane systolic excursion; PW, posterior wall.

|                                                 | Athletes<br>(n = 308) | Controls<br>(n = 48) | P     |
|-------------------------------------------------|-----------------------|----------------------|-------|
| Age (years), mean ± SD                          | 36.4 ± 11.6           | 49.3 ± 16.1          | <.001 |
| Women, n (%)                                    | 80 (26.0%)            | 20 (41.7%)           | .02   |
| Body mass index (kg/m <sup>2</sup> ), mean ± SD | 22.5 ± 4.9            | 22.5 ± 3.5           | .02   |
| Comorbidities, n (%)                            |                       |                      |       |
| Arterial hypertension                           | 8 (2.6%)              | 12 (25.0%)           | <.001 |
| Dyslipidaemia                                   | 13 (4.2%)             | 15 (31.3%)           | <.001 |
| Smoker (former or present)                      | 9 (2.9%)              | 13 (15.4%)           | <.001 |
| Diabetes                                        | 0                     | 4 (8.3%)             | <.001 |
| LAiV (mL/m <sup>2</sup> ), mean ± SD            | 29.8 ± 8.6            | 25.6 ± 8.0           | .006  |
| Left atrial enlargement, n (%)                  | 113 (36.7%)           | 5 (10.4%)            | <.001 |
| Mild                                            | 98 (31.8%)            | 5 (10.4%)            |       |
| Moderate                                        | 10 (3.2%)             | 0                    |       |
| Severe                                          | 5 (1.6%)              | 0                    |       |
| IVS thickness (mm), mean ± SD                   | 9.7 ± 1.55            | 8.8 ± 1.6            | .002  |
| PW thickness (mm), mean ± SD                    | 9.6 ± 2.7             | 9.1 ± 6.2            | .53   |
| LV end-diastolic diameter (mm), mean ± SD       | 51.6 ± 4.3            | 48.0 ± 5.7           | <.001 |
| LV end-systolic diameter (mm), mean ± SD        | 32.1 ± 4.2            | 27.4 ± 5.5           | <.001 |
| LV indexed mass (g/m <sup>2</sup> ), mean ± SD  | 96.0 ± 22.1           | 88.0 ± 11.3          | .09   |
| LVEF (%), mean ± SD                             | 68.1 ± 5.1            | 72.9 ± 5.4           | <.001 |
| TAPSE (mm), mean ± SD                           | 25.9 ± 2.7            | 23.2 ± 3.8           | <.001 |
| Transmitral filling pattern, n (%)              |                       |                      |       |
| Normal                                          | 273 (88.6%)           | 44 (91.7%)           | .483  |
| Impaired relaxation                             | 34 (11.0%)            | 4 (8.3%)             |       |
| Pseudonormal or restrictive                     | 1 (0.3%)              | 0                    |       |

**Table 2. Electrocardiographic data analysis of athletes and controls.** Data are presented as frequencies (percentages) or mean (± standard deviation, SD), as appropriate.

|                                      | Athletes<br>(n = 308) | Controls<br>(n = 48) | P   |
|--------------------------------------|-----------------------|----------------------|-----|
| <b>P-wave</b>                        |                       |                      |     |
| P-wave duration (ms), mean ± SD      | 106.3 ± 12.5          | 108.2 ± 7.7          | .31 |
| Voltage in lead DI (mV), mean ± SD   | 0.08 ± 0.04           | 0.08 ± 0.04          | .79 |
| Interatrial block, n (%)             | 40 (13.0%)            | 4 (8.3%)             | .36 |
| <b>Other ECG parameters</b>          |                       |                      |     |
| PR interval (ms), mean ± SD          | 167.0 ± 25.1          | 164.8 ± 21.5         | .56 |
| Right bundle branch block, n (%)     |                       |                      | .05 |
| No                                   | 259 (84.1%)           | 46 (95.8%)           |     |
| Incomplete                           | 45 (14.6%)            | 1 (2.1%)             |     |
| Complete                             | 3 (1.0%)              | 1 (2.1%)             |     |
| QRS complex duration (ms), mean ± SD | 84.3 ± 11.2           | 84.8 ± 10.9          | .79 |
| QRS complex axis (°), mean ± SD      | 55.2 ± 30.1           | 49.7 ± 28.4          | .23 |
| QTc interval (ms), mean ± SD         | 392.8 ± 23.3          | 398.2 ± 26.2         | .14 |
